# Supplementary material
Source: publisher figshare collection journal article supplement (https://gsajournals.figshare.com/articles/dataset/_/8239778)
Supplement: Supplementary file 1 [file 1]

# Supplementary Table 1

Table S1. *Cryphonectria parasitica* strains used in this study. *vic* genotypes and cross designations from (Cortesi and Milgroom, 1998).

| <b>Strain</b>   | <b>MAT</b> | <b><i>vic</i> genotype</b> | <b>EU type</b> | <b>Origin</b>  |
|-----------------|------------|----------------------------|----------------|----------------|
| <i>EP155</i>    | 2          | 2211-22                    | EU5            | ATCC#38755     |
| <i>P74-3</i>    | 2          | 2221-22                    | EU60           | P1-11 × P50-16 |
| <i>P78-8</i>    | 1          | 2221-22                    | EU64           | P50-4 × P74-7  |
| <i>P1-5</i>     | 1          | 1211-22                    | EU31           | PC17 × PC7     |
| <i>P1-6</i>     | 1          | 2111-22                    | EU6            | PC17 × PC7     |
| <i>P4-4</i>     | 1          | 2212-22                    | EU1            | VO54 × PC7     |
| <i>P5-1</i>     | 1          | 2212-22                    | EU1            | VO54 × VO64    |
| <i>MJ1-3-20</i> | 1          | 2211-12                    | EU21           | P17-8 × JA17   |
| <i>P24-33</i>   | 1          | 2211-21                    | EU18           | P4-4 × SA26    |

## Supplementary Table 2

**Table S2.** Primers used for RT-qPCR.

<sup>1</sup> CpID – protein IDs provided for primers which were designed in this study based on EP155 sequence from JGI *C.*

| Primer names     | CpID <sup>1</sup> | Sequence (5' - 3')        | Reference              |
|------------------|-------------------|---------------------------|------------------------|
| Reference genes  |                   |                           |                        |
| 18S-F            | 101864            | ATAACAGGTCTGTGATGCCCTTAGA | (Parsley et al., 2002) |
| 18S-R            |                   | CAGGGACGTAATCAACGCAAG     |                        |
| gpd1-RTQ2-F      |                   | GCCTACATGCTCAAGTATGACTC   | This study             |
| gpd1-RTQ-R       |                   | AAGACACCAGTGGACTCGACAAT   |                        |
| Mating genes     |                   |                           |                        |
| Mf2-1 RTQ - F    | 85578             | AATGCCTTCCAACACCCAGAC     | This study             |
| Mf2-1 RTQ - R    |                   | GCTCTTATGGCGTGGGCTG       |                        |
| Mf1-1 RTQ - F    | 333020            | CCTGAGGCTTGGTGTCTCTT      |                        |
| Mf1-1 RTQ - R    |                   | GAACTCAGGAGGCTCCGAG       |                        |
| MAT-1 RTQ - F    |                   | ATCTTGCTGGCACCATCTGT      |                        |
| MAT-1 RTQ - R    |                   | CATTCTCGAGGGGCAGTCCA      |                        |
| MAT-2 RTQ-F      | 44005             | GGTCGAAGCAGGAGTGGAA       |                        |
| MAT-2 RTQ-R      |                   | CGACCCCTTCACTGGAGCTTAC    |                        |
| cpVIB1-RTQ-F     | 67224             | CCATCGTCCCTACCGCTCA       |                        |
| cpVIB1-RTQ-B     |                   | TTCTCCCTCTCTACCGCTTG      |                        |
| HET domain genes |                   |                           |                        |
| dev3a-RTQ-F      | 261856            | GCACCCCAATTTTGAGTTCTCC    | This study             |
| dev3a-RTQ-R      |                   | GCACTCTCTCCATTGCCCAAG     |                        |
| dev3b-RTQ-F      | 262887            | CAGCCCAGGACATTAGAGACA     |                        |
| dev3b-RTQ-R      |                   | TCGGTCCGTATAGTACAGCTC     |                        |
| dev3g-RTQ-F      | 240373            | CCATGAGAACGCCTACATGACA    |                        |
| dev3g-RTQ-R      |                   | CTCCTCACGCAAATCTCGTCT     |                        |
| vic1a-RTQ-F      | 258862            | TCGCTCTGCATTATCCAGGAC     |                        |
| vic1a-RTQ-R      |                   | TCTATGTCGCCATCACCAC       |                        |

*parasitica* genome project.
